# Supplementary figures and images for: IRF4 and BATF are critical for CD8+ T-cell function following infection with LCMV
Source: PubMed Central journal article supplement — Cell Death Differ. 2014 Feb 14;21(7):1050–60. doi: 10.1038/cdd.2014.19 (PMC4207473; doi:10.1038/cdd.2014.19), 2014-02-14

**Figure S1**

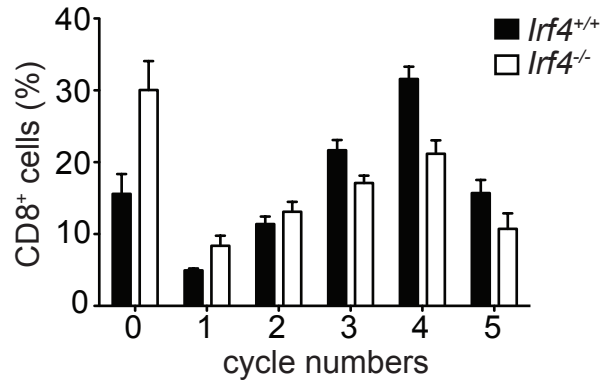

Supplement: cdd201419x1.pdf [file cdd201419x1.pdf]

**Figure S2**

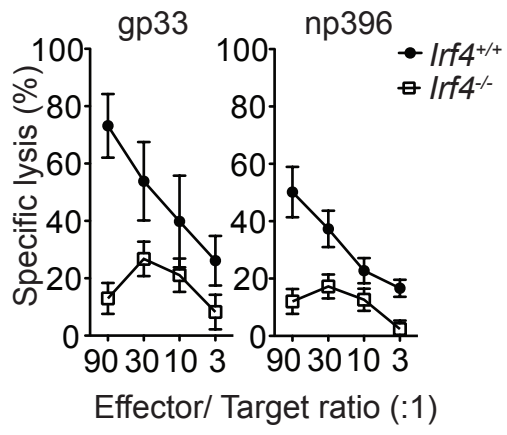

Supplement: cdd201419x2.pdf [file cdd201419x2.pdf]

**Figure S3**

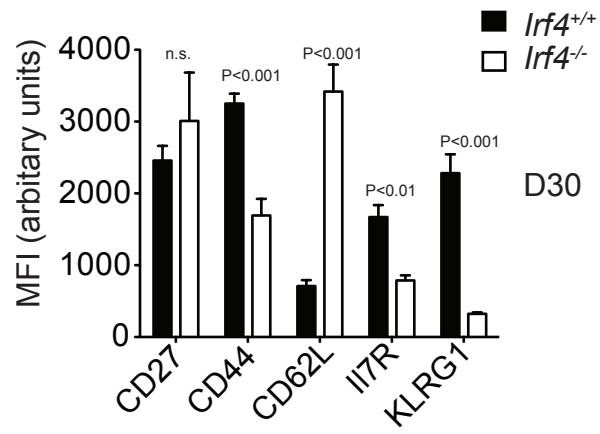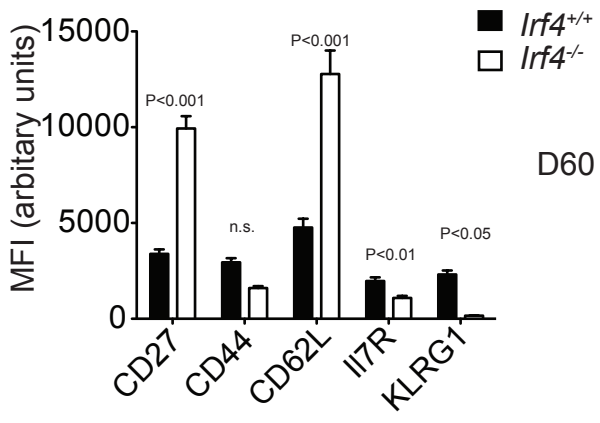

Supplement: cdd201419x3.pdf [file cdd201419x3.pdf]

Figure S4

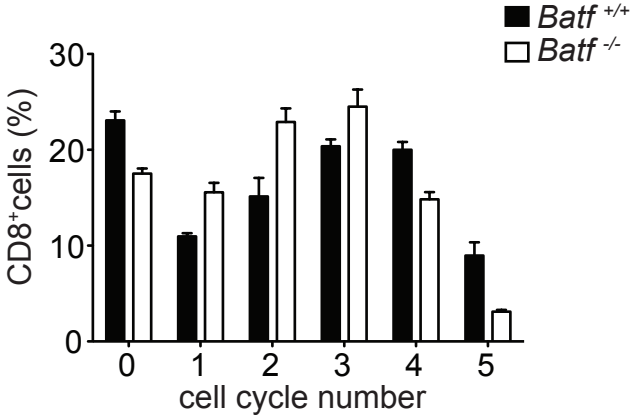

Supplement: cdd201419x4.pdf [file cdd201419x4.pdf]
